# Supplementary material
Source: Research Square preprint supplement (doi:10.21203/rs.3.rs-9097430/v1)
Supplement: Supplementary file 1 [file 425d21b103544c64adec5618.docx]

**Supplementary Table: Sustainable Settlement design framework codes (complete table)**

| **Theme** | | | **Thematic Categories** | | | | **Total Code** | **Example** | | |
| --- | --- | --- | --- | --- | --- | --- | --- | --- | --- | --- |
| Hazard | | | Hazard  Prospective (Haz-Pro) | | | | (29) | 1. Finland’s EcoCity concept uses local renewable energy sources, sustainable architecture, local materials, energy efficiency, and water efficiency to address wastewater, solid waste management and flooding [1]. 2. Eco-design promotes solar energy installation, including solar thermal and photovoltaic systems to meet heating, ventilation and air-conditioning needs in reducing carbon dioxide [2]. 3. Affordable housing in partnership (AHP) adopts green building norms aligned with sustainable construction to provide thermal comfort, reduced energy, and environmental impact and safety against earthquakes[3]. 4. GIFT City in Gujarat is built through Green Development using innovative planning, plan financing and land pooling with provision of affordable housing for the expanding population [4]. 5. AHP vertical promotes use of resource efficient, climate responsive, disaster resilient and eco-friendly technologies and processes [3]. 6. Houses under the scheme should be designed for structural safety against earthquake, flood, cyclone and landslide, conforming to National Building Codes (NBC)” [3]. 7. Green House Gas reduction through off-grid solution, energy-saving rebates and incentive programs are intended for sector of agriculture, waste, transport and energy for managing human settlement [5]. 8. Prime Minister Awas Yogna supports the construction of pucca house (all-weather dwelling unit) by providing financial assistance to the economically weaker section [3]. 9. Preserving open spaces, parks and recreational spaces to reduce urban heat effects and promote eco-balance [4]. 10. Smart cities ensure 80% energy-efficient green building in redevelopment, reducing high energy use [4]. 11. Incremental settlement adjust alternate livelihood, building retrofits, houses on stilts, rainwater harvesting and risk-sensitive activities for public spaces to mitigate flood [5] 12. Ensure risk-informed investment planning and budgeting for risk resilience program, convergence budgeting and DRR management fund [5] 13. Green recovery using green investment could cut 25% off 2030 emissions, lowering GHG emissions, creating green jobs and energy security [5] 14. Physical Assets include mitigation resources and strategies such as earthquake resilient materials, presence of plants and trees to maintain cooler temperature and cleaner air [5] 15. Deprive framework identifies missing data in physical hazard and strengths data collection, analysis to fill gaps and support better risk- informed planning [5] 16. Integrated Model Framework indicates influence of water source contamination and public health risk due to sewage and sullage (grey water) disposal can be prevented through behaviour change and awareness [6]. 17. Investment in real-time information on telecom data, satellite data and street photography can address unpreparedness for disaster and anticipate risk-informed planning [7] 18. Support the adoption of suitable technology and enable knowledge exchange to support urban inquiry and action [7] 19. Municipality invests in resources to upgrade water and sanitation in double-story shacks through climate-proof dwelling design in Durban [8] 20. Create a physical prototype depicting the materials and assessment of energy, cost saving, health benefit, well-being and productivity in housing-related health hazard [9] 21. Abstract idea of a house covered with a raincoat led to the development of a false roof with garden cloth to increase thermal comfort in the informal settlement [9] 22. Promote mixed land-use in area-based development to make land more efficient”[4] 23. Adopt an early warning system using social media or sms [8] 24. Flood or earthquake-resistant building and flood-resistant crop varieties are promoted [5] 25. Flood catchment/ detention pond to reduce flood impact [5] 26. Promote nature based solution through mangrove plantation serving as a buffer against strong winds [5] 27. Technology Innovation Grant under developers for adoption of innovation, sustainable, green and disaster resilient technologies as building material for cost-effective, faster and quality construction [3] 28. “Promoting indigenous ​vegetation to mitigate land degradation [2] 29. Conduct and update hazard mapping of the informal settlement [8] | | |
|  | Hazard  Corrective (Haz-cor) | | | | | | (32) | 1. Conduct participatory mapping to obtain information about topography, environmental hazard and risk [8] 2. Use of fire-resistant material for building and modular structure for extension [8] 3. Avoid construction near the river or raise the building on silts to avoid flood risk in an informal settlement [8] 4. Resident’s perception of health and well-being hazard for prioritising hazard was conducted through self-assessment of residents residing [9] 5. Survey-based risk assessment was conducted by a researcher in PAR for indoor air pollution in low-income households [8] 6. Urban agriculture promotes local food production and reduces transportation demand and cost [2]. 7. Foster bicycle use, keep 75% of the road network for pedestrians, and reduce private mobility to reduce transportation energy demand [2]. 8. Avoid water scarcity adapt to diversifying water resources like rainwater, groundwater and recycled water for harvesting [2]. 9. Install a noise-reduction element to minimise acoustic pollution [2]. 10. Develop adequate legislation and raise awareness of the citizens through education towards a sustainable lifestyle [1] 11. Ministry will assist with capacity building activities of social audit, exposure visit and training and workshop to the state [3]. 12. Create awareness among various stakeholders on innovative housing construction and materials to enhance energy efficiency and disaster resilience [3] 13. Creating walkable localities, pedestrian and cycling infrastructure to reduce congestion and air pollution [3] 14. Smart city in retrofitting for are improvement that applies smart solutions [4] 15. Smart city in retrofitting for are improvement that applies smart solutions [4] 16. Housing provided in Greenfield, should be 15% in the affordable housing category [4] 17. Smart solutions in the transport sector, like intelligent traffic management educing commute time [4] 18. Use of Climate and Disaster Risk Assessment, with health-related risk, to update the plan [5] 19. Ensuring transparent and accountable governance to strengthen funding transparency for climate and disaster programs [5] 20. Plan a low-impact, eco-sensitive built environment to minimise unsustainable lifestyle [6] 21. Apply a cross-disciplinary complex system approach to avoid urban planning failure [7] 22. Integrating big data-sharing platforms across agencies to capture an informal house estimate of exposure. 23. Promoting wastewater recycling [1] 24. Making earth observational technology and geo-spatial data available for public [1] 25. Upgradation of tenable slums with housing and infrastructure [3] 26. Multi-flood building to accommodate flood [5] 27. Floodways or a widened basement to make room for fluvial floods[5] 28. Alternative skills and sources of livelihood in anticipation of hazard impact 29. Solar domestic water heating [1] 30. Create a recycling station and links with the existing market [1] 31. Groundwater pollution and water scarcity threatens community; thus, obtaining information about its response to mitigate will help to maintain sustainability. [6] 32. Community response to muddy areas through heavy rain by extensively paving the surrounding areas for easy pedestrian movement [6] | |
|  | | Hazard Compensatory (Haz-com) | | | | (20) | | 1. “informal settlement are resilient through extensive fieldwork and community engagement in the ISU project [9] 2. Development of an effective communication Framework with reflection on implicitly disciplinary assumptions, vocabularies, cultural values and norms in transdisciplinary integration [9]. 3. Providing researchers with adequate training and support, requiring more knowledge, the use of participatory techniques and tools and practices in a transdisciplinary project [9] 4. Plan settlement on local climate and hazard profile by using local available resources and minimise emission, so it can fit within the capacities of local, regional and global ecosystem [2] 5. Applying a life-cycle approach in neighbourhood design, from planning through design, ensures resource efficiency, lower environmental impact and long-term resilience [2]. 6. Developing assessments framework responding to local conditions and the community through EcoCity development [1] 7. Resilience can be improved by ensuring density and space standards, providing safe water, sewerage and sanitation for urban dwellers to ensure liveability [1] 8. A smart city contains a wish list of infrastructure representing an urban ecosystem with institutional, physical, social and economic infrastructure serving as a long-term goal [4]. 9. Encroachment-free public areas, ensuring the safety of citizens through the Smart City proposal [4] 10. Creating resilient and green jobs, livelihoods, social enterprise and micro-enterprises [5] 11. Resilient and Green Land-use through DRR strategies and Private Public Partnership [5] 12. Capturing youth dividends as the primary mover of resiliency building and engaging sustainable leaders [5] 13. Empower home associates to promote green growth [5] 14. AMBISYON NATIN 2040 long-term vision and aspiration of Filipino people [5] 15. Revitalising ecosystem restoration commitment through national policies and law for long-term planning and sustainability [5] 16. Unplanned urbanisation and unplanned in-migration need to be controlled, which affects the well-being of residents [10] 17. Deprived Framework encourages familiarising with Earth Observational data to make data about flood zones, air pollution by sharing humanitarian data exchange [10] 18. System hazard follows past decision and inherent structure without local context, whereby the use of a place-based solution is encouraged [7] 19. Encourage non-motorised transport (walkability and cycling) [4] 20. EcoCity goes beyond ecological favour; it includes inter-generational equity, intra-generational equity and economic viability and diversity [1] |
| Vulnerability | | | | | Vulnerability Prospective (Vul-pro) | | (16) | 1. Promoting community events, gathering engagement and demonstration projects with community profiling and enumeration inthe informal sector [8] 2. Encourage dialogue between slum residents for acquiring knowledge and lived experience [8] 3. Support existing livelihood strategies and promote home-based business, urban farming, recycling initiative and dwelling rent (ISU) in unplanned neighbourhood areas [8] 4. The Opti house project is a transdisciplinary collaboration to improve the design, refurbishment and operation of housing for low-income households. [9] 5. The platform was created between slum residents and stakeholders in a participatory workshop working locally in housing, sustainable design and providing feedback [9] 6. Strategic residential Area limited planning felicity force housing over mixed land use affected the locals of Vallbona neighbourhood, a preventive measure of mixticity in land use was considered [2] 7. Households belonging to EWS, LIG and MIG can apply for a housing loan through urban local bodies identified by the State [3] 8. Green recovery can bring economies out of recession through design, GHS reduction, create job and prioritise equality [5] 9. Localised indicators for more accurate vulnerability identification and between planning decisions [10] 10. The scheme should be name of the female head of the household in [3] 11. While making allotment in AHP, families with a person with disability and a senior citizen may be allotted the ground floor [3] 12. If the applicant is a widower, unmarried or transgender, the house will be in the individual’s name [3] 13. Scaling up low-income and pro-poor housing and shifting to thematically integrated settlement within a coherent and efficient system [5] 14. Quality assistance repost take preventive and curative measures to ensure standard quality houses, including Anganwadi centre, rainwater harvesting and solar energy system [4] 15. Replacing overhead electric wiring with underground wiring, an encroachment-free public area and ensure safety of women and children [4] 16. Smart technology for the development of the poor and marginalised will be an important part of the proposal [4] | |
|  | | | | Vulnerability Corrective (Vul-cor) | | | (23) | 1. Necessary provision of a ramp for the disabled and senior citizens [3] 2. PAY will ensure special focus will be given to street vendors, street sweepers, Anganwadi workers, building, construction workers and residents of slums [3] 3. Existing slum will be demolished and redeveloped in-situ for a multi-storied building with basic amenities and social infrastructure [3] 4. The state must provide heritable but non-transferable land rights to landless beneficiaries [3] 5. Social audit must include minority, backward cast and persons with disabilities in Social Audit [3] 6. Minimum 100 dwelling units should be selected for Social Audit [3] 7. The State may propose untenable slums located on environmentally hazardous sites, or alternate land with all basic amenities [3] 8. Ensuring direct access to community service for the vulnerable population, Barangay health emergency response teams, health workers and Nutrition Scholar as part of risk management [5] 9. Design infrastructure and services which can benefit the vulnerable population from rapid changes in the urban system [7] 10. Use multiple data sources, field verification and regular updates on informal employment, which is often undercounted in public datasets [7] 11. Community attitude response and feedback should be systematically collected into planning and sustainability [6] 12. Communities are often constrained by a lack of resources or technical knowledge, but local knowledge and skills can be tapped by the government through co-production [8] 13. Integrating gender-sensitive indicators to ensure women’s active participation [8] 14. Vulnerability to politicised intervention [8] 15. Acknowledge the skills and knowledge of vulnerable groups as decision makers 16. Ridge to reef approach for harnessing biodiversity and ecosystems to address sustainability [5] 17. Economic sector transition to circular economy, especially for more vulnerable or unstable sectors [5] 18. Waste water recycling and smart metering are making a substantial contribution to water management [4] 19. Time-transact of informal residents’ daily household to understand their practices, needs and relationship with the house [8] 20. Integrated policies for women and children in human settlement planning, like violence against women and children, responsible parenthood and health promotion framework [5] 21. Groundwater recharge is obstructed by paved surrounding areas, depleting groundwater recharge, and threatening the sustainability of the community [6] 22. Pictorial hazard cards used by slum dwellers grouped to assess their household hazard were held [9] 23. Waste collection at street level [2] | |
|  | | | | Vulnerability Compensatory (Vul-com) | | | (14) | 1. e.g. inadequate infrastructure on illegal land for informal dwellers, the settlement by illegal electrical connection was compensated with an incremental upgrade [8] 2. Engagement between different actors, highlighting the integration between academic disciplines, vulnerable communities and stakeholders in co-creation and co-production [9] 3. Low Income Group (LIG) and Middle Income Group (MIG) income brackets are defined, where the state shall have the flexibility to redefine the annual income criteria of Economically Weaker Section (EWS) [3] 4. Permanent houses are provided through the housing scheme to the parents of the eligible beneficiary [3] 5. CSMC will provide administrative and financial matters faced by the Urban Local Bodies during the implementation of the scheme [3] 6. Fund mobilisation by the ULB, for the construction, is available to the beneficiary [3] 7. Public-Private Entities may construct and maintain ARH to provide accommodation to eligible EWS/LIG families [3] 8. Centre and State will be leveraged to attract funding from sources to implement the Smart City Proposal [4] 9. Certification guidelines on green jobs, especially for vulnerable groups, especially person with disabilities [5] 10. Creation of a fund and a disbursement mechanism to support the adaptation activities of the local government [5] 11. Promote climate finance through the use of local DRRM fund for pre-disaster preparedness, Innovation grant, extension of credit Risk Program to financial institution and green mortgage loans [5] 12. Risk transfer mechanism through insurance [5] 13. Urban indices fail to include different social group sex-disaggregated data, making gender -based privation and risk visible; thus, social vulnerability factors should be measured [10] 14. Urban form changes at different speeds, where an integrated assessment framework is needed, where planners can measure competing urban priorities [7] | |
| Exposure | | | | Exposure Prospective (Exp-pro) | | | (13) | 1. Explore alternative materials like adobe brick, rammed earth flooring and building simulation to reduce exposure to key hazards [9]. 2. In Namibia, the informal settlement suffers from water shortage and electricity supply intermittency, opting for reblocking and a community contract model [8] 3. In the Piesang river, the old informal settlement have two-0storey flats, cottages and single-storey houses through the land purchase and regularisation process [8] 4. The Havelock island their settlement is characterised by several hazards such as illegal electrical connections, cables sprawled across paths, fire hazard and flooding, which were resolved through PAR [8] 5. Havelock island having household toilet, and the municipality has installed ablution blocks to collect water, established trained Community Researchers for upgrading [8] 6. Using building simulation to calculate energy from key hazards such as heat and cold waves, air pollution and mould [9] 7. Accessibility of the unfiled web portal for city-wise house plan to be filled by ULB on real time basis [3] 8. Households are exposed to low socio-economic status and poor housing, which can be reduced by improving education, livelihood and health care. 9. Society exposed to hazard, to resist, absorb, accommodate, adapt, transform and recover from hazard in a timely and effective manner [5] 10. Households located in deprived areas are exposed to area-level risk, which can be prevented by forward-looking area-based improvement [7] 11. Strengthen Private Public Partnership to support financing of settlement infrastructure and utilities [5] 12. A study on household-level and area-level deprivation with a focus on Low and Middle Income group should be conducted [10] 13. Enhancing urban transformation from the perspective of communities by articulating and mapping positive drivers [8] | |
|  | | | | Exposure Corrective (Exp-cor) | | | (26) | 1. Informal settlement upgrading promotes enhancing skills, exploring indigenous knowledge and shared lessons between communities [8] 2. Solar passive architecture and natural ventilation system to minimise demand for energy in eco-design [2] 3. To use local renewable energy sources and a heating network [2] 4. To maintain the agricultural mosaic of the area in the city, promoting great landscape value [2] 5. Promote water self-sufficient water consumption demand [2] 6. Local Food production through urban agriculture Eco-design [2] 7. Neighbourhood analysis, thorough monitoring and evaluation, Eco-design [2] 8. Understanding local priorities through site visits and meetings with key stakeholders [1] 9. Identifying potential funding instruments to support development [1] 10. Energy plans and tariffs, use of renewable resources [1] 11. Skill and willingness for job creation and training courses [1] 12. Developing a dissemination and communication campaign through media [1] 13. Raising awareness of the citizen through education and a sustainable lifestyle [1] 14. A green human settlement will create opportunities to mitigate GHG, utilise ecosystem services in settlement development [5] 15. Provide an incentive for the green building initiative [5] 16. Ensure preventive measures and the sustainability of emergency equipment used in risk prevention [5] 17. Outdoor air pollution and road traffic accidents increase residents' safety risk. To mitigate it, build a green buffer, clear transport and emission standards [10] 18. Advocate for sustainable urban design [10] 19. Energy efficiency and climate-proofing mechanisms for public infrastructure, cultural ​​facilities, and socioeconomic infrastructure (including ​​telecommunications facilities) [10] 20. The multi-stakeholder process should ensure that people of different background like gender, age group, abilities, ethnicities and sexual orientation, living in deprived areas are mapped and measured [10] 21. Retrofitting existing government-funded vacant houses into Affordable Rental Housing through Public-Private Partnership [3] 22. Creation of new jobs by attracting new firms, increasing productivity and business climate in the informal sector [4] 23. Reduction in commuting time by supporting non-motorised transport and improving air and water quality [4] 24. Groundwater drying or seawater entering aquifers affects open bore-wells, promoting rainwater harvest to recharge groundwater [6] 25. Conducting site walkthrough with residents in informal settlement [9] 26. Design household -level rainwater harvesting [5] | |
|  | | | | Exposure Compensatory (Exp-com) | | | (16) | 1. Eco-action plan should be considered through a life cycle approach and system thinking perspective [1] 2. ISU toolkit deployed an adaptation of a gender-inclusive approach for informal settlement dwellers in South Africa [8] 3. Changing livelihood and production based on changing seasonal patterns [5] 4. Settlement scale technological innovation [5] 5. Shifting towards circular economy [5] 6. Blue-green economic strategies include financial support for green production, especially local initiatives [5] 7. PAR and transdisciplinary collaboration need to be explicitly and transparently built into project design [9] 8. Participatory, inclusive and transparent governance towards climate justice [5] 9. Adoption of layout design and building plans suitable for various geo-climatic zones [5] 10. Facilities and service domain includes availability, accessibility, affordability of school, health, bank and cultural amenities services for a thriving city [10] 11. Provide aspiration and needs of the citizen, urban planner aiming to develop the entire urban ecosystem representing institutional, physical, social and economic infrastructure [4] | |
|  | | | |  | | |  | 1. Avoiding biased intervention in city planning, dialogue between different stakeholders to balance competing power [7] 2. Empower homeowner associations to promote green growth communities [5] 3. Promote green enterprise skill development, especially among women in informal settlements [5] 4. Circular metabolic flow and trend towards self-sufficiency [2] 5. Ensuring last mile para-transport connectivity [4] | |
| Community  Involvement | | | | Community Participation  (Com-par) | | | (24) | 1. Mapping activity with the community [8] 2. Promoting co-production strategies through learning exchanges, festival exhibition, self-enumeration and participatory mapping in informal settlements [8] 3. Participatory mapping with drone photography and GIS data collection can be a basis for co-designing a practical solution [8] 4. Develop a community solid waste management strategy [8] 5. Create a recycling station and links with the existing market [8] 6. Participatory Action Planning in settlement upgrading and enabling participation [8] 7. Bottom-up strategies like observation, transect walk, in-depth interviews and recording [8] 8. Group activities to discuss neighbourhood upgrading of houses through group discussion, mind mapping and mapping games [9] 9. Prototyping and testing through community meeting [9] 10. Factsheet illustration design of health and energy benefit in close collaboration with the field facilitator and the community [9] 11. Focus group with informal residents in self-assessments and survey risk assessment ranking for residents' perspective on housing problem [9] 12. Platform creation between residents and various stakeholders in a participatory workshop [9] 13. Promoting social participation [2] 14. Citizen participation is necessary for the implementation of EcoCity principles if long-term results are to be achieved [1] 15. Workshop, seminar, and discussion promoted sustainable living with citizens’ wellbeing and quality of life [1] 16. Capacity building course for local urban planners [1] 17. Training for a construction worker [1] 18. Meeting with local business actors and academics to know local market features [1] 19. Citizen-driven proposal achieved through citizen consultation, active participation of Resident Welfare Association, taxpayer association, Senior Citizen and Slum Dwellers Association for a citizen-driven solution [4] 20. Stakeholder engagement in hazard vulnerability and risk analysis [5] 21. People’s empowerment of urban governance facilitates sustainable resource use and finance [5] 22. Adopt a need-based approach in providing capacity training and development, community participation [5] 23. Citizen involvement of people in deploying smart solutions, implementing reforms, and designing post-project structures will enable Smart-city [4] 24. Development of a community engagement Strategy which includes guidelines on engagement with community groups, municipality officers and students [8] | |
|  | | | | Community Power (Com-pow) | | | (18) | 1. ISU toolkit’s core idea is that the community should be self-reliant [8] 2. Community-led upgrading project run by the local communities [8] 3. Trust building by sharing knowledge and developing maps [8] 4. Co-develop adaptation strategies within the community with support from the academic and municipality [8] 5. Direct learning from community sharing common challenges in unplanned settlement [8] 6. Active community leadership and membership-based representative in Havelock Island [8] 7. Access to decision-making structure for the community [8] 8. Trained community researchers to enhance technical management and communication skill advocating for upgrading efforts [8] 9. Focus group discussion provided evidence and solutions to residents’ practice needs and aspirations [9] 10. After the community workshop, each participant ranked the solution in preference were recorded [9] 11. Selection of a resource manager in eco-design for city management to handle local resources [2] 12. Sustainable neighbourhood planning evaluated by the city council resulted in feedback after public hearing and debate [2] 13. Bottom-up initiative ensuring all stakeholders are involved in real participation [1] 14. Formation of Resident Welfare Association and Apartment owner association under the scheme and urban local body [3] 15. Citizen-friendly and cost-effective online services to bring accountability and transparency using mobiles and e-groups to obtain feedback [4] 16. Youth-led resilience building in the planning process, creating a platform for green innovation [5] 17. Engaging local sustainability leader promoting grassroots leadership, focus skill development and empowerment [5] 18. Community to the public with outreach to validate data and get feedback from residents [8] | |

**Reference**

[1] C. Antuña-Rozado, J. García-Navarro, P. Huovila, Challenges in adapting sustainable city solutions from Finland to Different Contexts Worldwide: A Libyan Case Study, Energies (Basel). 12 (2019). https://doi.org/10.3390/en12101883.

[2] R. Farreny, J. Oliver-Solà, M. Montlleó, E. Escribà, X. Gabarrell, J. Rieradevall, The ecodesign and planning of sustainable neighbourhoods: the Vallbona case study (Barcelona) El ecodiseño y planeamiento de barrios sostenibles: el caso de estudio de Vallbona (Barcelona), 63 (2011) 115–124. https://doi.org/10.3989/ic.

[3] Ministry of Housing and Urban Affairs, Pradhan Mantri Awas Yojana-Urban 2.0 Pradhan Mantri Scheme Guidelines Housing for All Mission Ministry of Housing and Urban Affairs, 2024. https://pmay-urban.gov.in (accessed April 3, 2025).

[4] Ministry of Urban Development, Smart Cities: Mission Statement and Guidelines, New Delhi, 2015.

[5] United Nation Habitat, The Resilient and Green Human Settlements Framework, Philipines, 2023. https://unhabitat.org/resilient-and-green-human-settlements-framework (accessed June 14, 2024).

[6] M. Mani, Koshy Varghese, L.S. Ganesh, Integrated Model Framework to Simulate Sustainability of Human Settlements, (2005). https://doi.org/10.1061/ASCE0733-94882005131:3147.

[7] M. Keith, N. O’Clery, S. Parnell, A. Revi, The future of the future city? The new urban sciences and a PEAK Urban interdisciplinary disposition, Cities 105 (2020) 102820. https://doi.org/10.1016/j.cities.2020.102820.

[8] M.C. Georgiadou, C. Loggia, I. Bisaga, P. Parikh, Towards sustainable informal settlements: a toolkit for community-led upgrading in Durban, Proceedings of the Institution of Civil Engineers - Engineering Sustainability 174 (2021) 83–93. https://doi.org/10.1680/jensu.20.00040.

[9] E. Nix, J. Paulose, C. Shrubsole, H. Altamirano‐Medina, K. Belesova, M. Davies, R. Khosla, P. Wilkinson, Participatory Action Research as a Framework for Transdisciplinary Collaboration: A Pilot Study on Healthy, Sustainable, Low‐Income Housing in Delhi, India, Global Challenges 3 (2019). https://doi.org/10.1002/gch2.201800054.

[10] A. Abascal, N. Rothwell, A. Shonowo, D.R. Thomson, P. Elias, H. Elsey, G. Yeboah, M. Kuffer, “Domains of deprivation framework” for mapping slums, informal settlements, and other deprived areas in LMICs to improve urban planning and policy: A scoping review, Comput. Environ. Urban Syst. 93 (2022). https://doi.org/10.1016/j.compenvurbsys.2022.101770.
